# Prepregnancy Dietary Protein Intake, Major Dietary Protein Sources, and the Risk of Gestational Diabetes Mellitus

## A prospective cohort study

WEI BAO, MD, PHD<sup>1</sup>  
 KATHERINE BOWERS, PHD<sup>1</sup>  
 DEIRDRE K. TOBIAS, SCD<sup>2</sup>

FRANK B. HU, MD, PHD<sup>2,3</sup>  
 CUILIN ZHANG, MD, PHD<sup>1</sup>

**OBJECTIVE**—Dietary protein is an important modulator of glucose metabolism. However, studies regarding the association between dietary protein intake and gestational diabetes mellitus (GDM) risk are sparse. This study was to examine the association.

**RESEARCH DESIGN AND METHODS**—Our study included 21,457 singleton pregnancies reported among 15,294 participants of the Nurses' Health Study II cohort between 1991 and 2001. Included pregnancies were free of chronic diseases before pregnancy or previous GDM. Generalized estimating equations were used to estimate the relative risks (RRs) and 95% CIs.

**RESULTS**—After adjustment for age, parity, nondietary and dietary factors, and BMI, multivariable RRs (95% CIs) comparing the highest with lowest quintiles were 1.49 (1.03–2.17) for animal protein intake and 0.69 (0.50–0.97) for vegetable protein intake. The substitution of 5% energy from vegetable protein for animal protein was associated with a 51% lower risk of GDM (RR [95% CI], 0.49 [0.29–0.84]). For major dietary protein sources, multivariable RRs (95% CIs) comparing the highest with the lowest quintiles were 2.05 (1.55–2.73) for total red meat and 0.73 (0.56–0.95) for nuts, respectively. The substitution of red meat with poultry, fish, nuts, or legumes showed a significantly lower risk of GDM.

**CONCLUSIONS**—Higher intake of animal protein, in particular red meat, was significantly associated with a greater risk of GDM. By contrast, higher intake of vegetable protein, specifically nuts, was associated with a significantly lower risk. Substitution of vegetable protein for animal protein, as well as substitution of some healthy protein sources for red meat, was associated with a lower risk of GDM.

*Diabetes Care* 36:2001–2008, 2013

**G**estational diabetes mellitus (GDM), defined as glucose intolerance with onset or first recognition during pregnancy, is a growing health concern (1). Approximately 7% (ranging from 1 to 14%) of all pregnancies in the U.S. are complicated by GDM, resulting in more than 200,000 cases annually (2). GDM is associated with an increased risk of

adverse pregnancy and perinatal outcomes (3) and long-term adverse health consequences for both mothers and their children, including a predisposition to obesity, metabolic syndrome, and type 2 diabetes mellitus (T2DM) (1,2,4); thus, the identification of modifiable risk factors that may contribute to the prevention of GDM is important.

Recently, several dietary and lifestyle factors have been associated with GDM risk, although precise underlying mechanisms have yet to be established (5). Macronutrients including carbohydrates (6) and fats (7) have previously been evaluated for their association with GDM risk. The association with protein, however, remains unclear. Dietary proteins and amino acids are important modulators of glucose metabolism, and a diet high in protein may impact glucose homeostasis by promoting insulin resistance and increasing gluconeogenesis (8). Moreover, emerging data suggest that protein actions may vary by the amino acid types and food sources. For instance, a prospective cohort study in Europeans showed that long-term high intake of animal protein but not vegetable protein was associated with an increased risk of T2DM (9). Additionally, a study of metabolomics recently demonstrated that plasma concentrations of several kinds of amino acids, including branched-chain amino acids (BCAAs) and aromatic amino acids, were strongly and significantly associated with incident T2DM risk (10).

Several major food sources of animal protein, such as red meat, were positively associated with the risk of both T2DM (11) and GDM (12). Conversely, higher intakes of nuts (13) and legumes (14) were associated with a lower risk of T2DM, but their associations with GDM have not yet been evaluated. In addition, the associations between other major sources of animal protein (e.g., poultry, fish, and dairy products) and GDM risk have not been reported.

In this prospective cohort study, we aimed to examine the associations of prepregnancy dietary protein intake (total, animal, and vegetable protein) as well as major dietary protein sources with the risk of GDM. We also estimated the effect of substituting prepregnancy protein for carbohydrates, substituting vegetable protein for animal protein, and substituting other major dietary protein sources for red meat on the risk of GDM.

From the <sup>1</sup>Epidemiology Branch, Division of Epidemiology, Statistics and Prevention Research, Eunice Kennedy Shriver National Institute of Child Health and Human Development, National Institutes of Health, Rockville, Maryland; the <sup>2</sup>Departments of Nutrition and Epidemiology, Harvard School of Public Health, Boston, Massachusetts; and the <sup>3</sup>Channing Division of Network Medicine, Department of Medicine, Brigham and Women's Hospital and Harvard Medical School, Boston, Massachusetts.

Corresponding author: Cuilin Zhang, zhangcu@mail.nih.gov.

Received 3 October 2012 and accepted 19 December 2012.

DOI: 10.2337/dc12-2018

This article contains Supplementary Data online at <http://care.diabetesjournals.org/lookup/suppl/doi:10.2337/dc12-2018/-/DC1>.

© 2013 by the American Diabetes Association. Readers may use this article as long as the work is properly cited, the use is educational and not for profit, and the work is not altered. See <http://creativecommons.org/licenses/by-nc-nd/3.0/> for details.

## RESEARCH DESIGN AND METHODS

The Nurses' Health Study II (NHS II) is an ongoing prospective cohort study of 116,678 female nurses aged 25–44 years at study inception in 1989 (15). The participants are sent a biennial questionnaire regarding disease outcomes and lifestyle characteristics, such as smoking status, medication use, and physical activity. Follow-up for each questionnaire cycle was >90%. This study has been approved by the institutional review board of the Partners Health Care System (Boston, MA), with participants' consent implied by the return of the questionnaires.

NHS II participants were included in this analysis if they reported at least one singleton pregnancy lasting >6 months between 1991 and 2001. GDM was last captured on the 2001 questionnaire, as the majority of NHS II participants passed reproductive age by then. Pregnancies were excluded if the participant reported GDM in a previous pregnancy, a diagnosis of T2DM, cancer, or a cardiovascular event prior to an otherwise eligible pregnancy. Pregnancies reported after GDM were not included because women with GDM in a previous pregnancy may change their diet and lifestyle during the next pregnancy to prevent recurrent GDM. Pregnancies were also excluded if the participant did not return a prepregnancy food frequency questionnaire (FFQ), left >70 FFQ items blank, or reported unrealistic total energy intake (<600 or >3,500 kcal/day).

### Exposure assessment

Beginning in 1991 and every 4 years thereafter, participants were asked to report their food intakes using a semiquantitative FFQ. Answers were provided in nine possible categories ranging from "never" to "6 or more times/day," with a standard portion size specified for each food. Major protein sources included the following (16,17): unprocessed red meat (beef or lamb as main dish, pork as main dish, hamburger, and beef, pork, or lamb as a sandwich or mixed dish), processed red meat (bacon, beef hot dogs, and sausage, salami, bologna, and other processed meats), poultry (chicken with and without skin, chicken sandwich, and chicken/turkey hot dog), fish (canned tuna, dark- and light-fleshed fish, and breaded fish), dairy products (whole milk, ice cream, hard cheese, full-fat cheese, cream, sour cream, cream cheese, butter, skim/low-fat milk, 1 and 2% milk,

yogurt, cottage and ricotta cheeses, low-fat cheese, and sherbet), eggs, nuts (peanuts, peanut butter, walnuts, and other nuts), and legumes (tofu or soybeans, string beans, peas or lima beans, and beans or lentils). Total red meat intake was calculated as the sum of unprocessed and processed red meat intakes.

Intakes of individual nutrients including protein were computed by multiplying the frequency of consumption of each unit of food by the nutrient content of the specified portions based on food composition data from U.S. Department of Agriculture sources (18). The reproducibility and validity of the FFQ have been extensively documented elsewhere (19–21). Pearson correlation coefficient between energy-adjusted protein intakes assessed by the FFQ compared with four 1-week diet records was 0.52 in a similar cohort of U.S. women (20).

### Covariate assessment

Participants reported their current weight on each biennial questionnaire. Self-reported weight was highly correlated with measured weight ( $r = 0.97$ ) in a previous validation study (22). BMI was computed as weight in kilograms divided by the square of height in meters. Total physical activity was ascertained by frequency of engaging in common recreational activities, from which MET hours per week were derived. The questionnaire-based estimates correlated well with detailed activity diaries in a prior validation study ( $r = 0.56$ ) (23).

### Outcome ascertainment

Incident GDM was ascertained by self-report on each biennial questionnaire through 2001. In the case of more than one pregnancy lasting >6 months reported within a 2-year questionnaire period, GDM status was attributed to the first pregnancy. In a prior validation study among a subgroup of the NHS II cohort, 94% of GDM self-reports were confirmed by medical records (15). In a random sample of parous women without GDM, 83% reported a glucose screening test during pregnancy and 100% reported frequent prenatal urine screening, suggesting a high level of GDM surveillance in this cohort (15).

### Statistical analysis

Exposure was computed as the percentage of total energy intake from protein using the nutrient-density method (24).

Prepregnancy dietary exposure measures were used to calculate the updated cumulative average intake for each individual at each time period to reduce within-subject variation and represent long-term habitual prepregnancy diet (25).

Participants were divided into quintiles according to the cumulative average intakes of dietary protein (% of energy) or major protein sources (servings/day) in their diet. Relative risks (RRs) and 95% CIs were estimated through multivariate logistic regression with generalized estimating equations, specifying an exchangeable correlation structure. Generalized estimating equations allowed us to account for correlations among repeated observations (pregnancies) contributed by a single participant. To compute the test for a significant trend across quintiles, we modeled median values of each quintile as a continuous variable.

Covariates in the multivariable models included age; parity; race/ethnicity; family history of diabetes; cigarette smoking; alcohol intake; physical activity; total energy intake; intakes of saturated fat, monounsaturated fat, polyunsaturated fat, *trans* fat, dietary cholesterol, glycemic load, and dietary fiber; and updated BMI when total protein intake was modeled as the exposure of interest. Animal protein and vegetable protein were mutually adjusted for one another. For the intake of major dietary protein sources, we adjusted for age; parity; race/ethnicity; family history of diabetes; cigarette smoking; alcohol intake; physical activity; total energy intake; dietary intakes of fruits, sugar-sweetened beverages, whole grains, and other major dietary protein sources (for mutual adjustment); and updated BMI.

To simulate the substitution of dietary protein for carbohydrates, we fit isocaloric models (24) by simultaneously including total energy intake and the percentages of energy (continuous) derived from total fat and protein, as well as the potential confounders listed above. The  $\beta$ -coefficient for total protein from these models estimated the effect of substituting 1% of energy from carbohydrates with 1% of energy from protein (26). For the estimation of substituting animal protein with vegetable protein, we simultaneously included total energy intake and the percentages of energy derived from vegetable protein, as well as the potential confounders listed above in the model. Similarly, we estimated the effect of

substituting one major protein source for another by simultaneously modeling all major protein sources (servings/day) with total energy and other potential confounders listed above. RRs and 95% CIs were estimated by computing the difference in the coefficients for two protein sources and their own variances and covariance (16,17,27).

Advanced maternal age is an established risk factor for GDM (28). We evaluated effect modification by age (<35 vs. ≥35 years), parity (nulliparous vs. parous), family history of diabetes (yes vs. no), and physical activity (highest two quintiles vs. lowest three quintiles) by stratified analyses. Since BMI is a possible intermediate between dietary protein and GDM, we estimated the proportion of the association between dietary protein intake and GDM risk that is explained by prepregnancy BMI (modeled continuously) (29) using an SAS macro developed by Dr. D. Spiegelman and colleagues at the Harvard School of Public Health (<http://www.hsph.harvard.edu/faculty/donna-spiegelman/software/mediate/>).

All statistical analyses were performed with SAS software (version 9.1; SAS Institute). *P* < 0.05 was considered statistically significant.

## RESULTS

### Baseline characteristics

Among the 21,457 eligible singleton pregnancies from the 15,294 women, during the 10 years of follow-up we documented 870 incident GDM pregnancies. Compared with the participants with lower total protein intake, those with higher protein intake were more likely to be nonsmokers and consumed more cholesterol, dietary fiber, magnesium, heme iron, potassium, calcium, meat, vegetables, and dairy products but less alcohol, carbohydrate, *trans* fat, and sugar-sweetened beverages during the prepregnancy time period (Table 1). Women who consumed more animal protein were likely to consume more total fat, saturated fat, cholesterol, heme iron, calcium, red meat, poultry, and dairy products. Women who consumed more vegetable proteins were likely to consume less of these food and nutrients.

### Prepregnancy dietary protein intake and the risk of GDM

The median intakes of prepregnancy total calories from protein in this population

were 15.2 and 23.3% of energy in the lowest and the highest quintile, respectively. Animal protein accounted for the majority of total protein intake. After adjustment for age, parity, nondietary and dietary factors, and BMI, animal protein intake was significantly and positively associated with GDM risk while vegetable protein intake was significantly and inversely associated with the risk; multivariable RRs (95% CIs), comparing the highest with lowest quintiles were 1.28 (0.90–1.83) for total protein intake, 1.49 (1.03–2.17) for animal protein intake, and 0.69 (0.50–0.97) for vegetable protein intake (Table 2).

Substituting 5% of energy from carbohydrates with animal protein was associated with a significant 29% greater risk of GDM (multivariable RR [95% CI], 1.29 [1.08–1.54]; *P* = 0.006). Substituting 5% of energy from vegetable protein for animal protein was associated with a 51% lower risk (0.49 [0.29–0.84]; *P* = 0.009) (Table 3).

The associations between prepregnancy dietary protein intake and GDM risk were not significantly modified by age, parity, family history of diabetes, or physical activity. Mediation analyses estimated that prepregnancy BMI explained 35.7% (95% CI 10.6–60.8; *P* = 0.005) and 31.1% (10.7–51.6; *P* = 0.003) of the total effects of total protein and animal protein on GDM risk, respectively. The effect of vegetable protein intake on GDM risk was not significantly mediated by BMI (12.2% [–21.1 to 45.4]; *P* = 0.47).

### Major prepregnancy dietary protein sources and the risk of GDM

Prepregnancy red meat consumption was significantly and positively associated with the risk of GDM. Multivariable RRs (95% CIs) for GDM among participants with the highest compared with the lowest quintiles of intakes were 2.46 (1.86–3.25), 1.89 (1.43–2.48), and 1.48 (1.13–1.95) for total red meat, unprocessed red meat, and processed red meat, respectively. These associations were attenuated but remained significant after additional adjustment for BMI, with RRs of 2.05 (1.55–2.73), 1.60 (1.21–2.12), and 1.36 (1.03–1.80), respectively. By contrast, greater prepregnancy nut consumption was significantly associated with a lower risk of GDM; the fully adjusted RR comparing the highest with lowest quintiles of intake was 0.73 (0.56–0.95) (Table 4).

Substituting one serving per day of total red meat with some healthy protein

sources was significantly associated with a lower risk of GDM: 29% lower risk for poultry (RR [95% CI], 0.71 [0.54–0.94]), 33% for fish (0.67 [0.46–0.98]), 51% for nuts (0.49 [0.36–0.66]), and 33% for legumes (0.67 [0.51–0.88]). Similar substitution estimates were observed for the replacement of unprocessed red meat and processed red meat (Supplementary Fig. 1).

**CONCLUSIONS**—In this prospective cohort study, we observed that a prepregnancy intake of animal protein, in particular red meat, was significantly and positively associated with GDM risk, while vegetable protein intake, specifically nuts, was significantly and inversely associated with GDM risk. Substituting 5% of energy from vegetable protein for animal protein and substitution of poultry, fish, nuts, or legumes for red meat were associated with a lower GDM risk.

Although protein may have beneficial effects on energy homeostasis by promoting thermogenesis, inducing satiety, and possibly increasing energy expenditure, it may also have detrimental effects on glucose homeostasis (8). Consumption of a high-protein diet for 6 months in healthy individuals induced a higher glucose-stimulated insulin secretion due to reduced glucose threshold of the endocrine β-cells, increased endogenous glucose output and plasma glucagon level, and enhanced gluconeogenesis (30). Recent studies examining different types and sources of dietary protein suggest that animal protein and vegetable protein may have divergent effects on diabetes. A prospective cohort study with 10 years of follow-up showed that the risk of T2DM increased with higher intakes of total protein and animal protein, but vegetable protein intake was not related to T2DM risk (9). It has been proposed that elevated incidence of diabetes in relation to high protein intake, in particular animal protein, might result from an accelerated “fatigue” or “failure” of pancreas islets (8).

Meat consumption has continued to rise over the past century in the U.S., with the largest proportion from red meat (58%) (31). Red meat consumption has been found to be positively associated with long-term weight gain (32) and risk of T2DM (11), coronary heart disease (16), stroke (17), and all-cause mortality (27). In this study, red meat consumption was significantly associated with an increased risk of GDM, which is consistent with our previous findings with shorter

**Table 1—Baseline characteristics according to quintiles of prepregnancy dietary protein intake among 15,294 participants in the Nurses' Health Study II**

|                                 | Total protein intake |             |              |              |              | Animal protein intake |             |              |             |             | Vegetable protein intake |             |             |              |  |
|---------------------------------|----------------------|-------------|--------------|--------------|--------------|-----------------------|-------------|--------------|-------------|-------------|--------------------------|-------------|-------------|--------------|--|
|                                 | Q1                   | Q3          | Q5           | Q1           | Q5           | Q1                    | Q3          | Q5           | Q1          | Q3          | Q5                       | Q1          | Q3          | Q5           |  |
| Participants (n)                | 3,006                | 3,173       | 2,793        | 3,015        | 2,862        | 3,140                 | 3,101       | 2,871        | 3,288       | 3,101       | 2,871                    | 3,288       | 3,101       | 2,871        |  |
| Age in 1991 (years)             | 31.8 (3.3)           | 32.0 (3.2)  | 32.2 (3.3)   | 32.0 (3.3)   | 32.0 (3.3)   | 32.0 (3.3)            | 31.4 (3.1)  | 32.7 (3.4)   | 31.4 (3.1)  | 32.0 (3.2)  | 32.7 (3.4)               | 31.4 (3.1)  | 32.0 (3.2)  | 32.7 (3.4)   |  |
| White (%)                       | 92                   | 94          | 93           | 92           | 93           | 94                    | 94          | 93           | 90          | 94          | 93                       | 90          | 94          | 93           |  |
| Family history of diabetes (%)  | 11                   | 11          | 13           | 10           | 12           | 12                    | 11          | 11           | 11          | 11          | 11                       | 11          | 11          | 11           |  |
| Nulliparous (%)                 | 41                   | 33          | 37           | 43           | 36           | 34                    | 34          | 44           | 34          | 34          | 44                       | 34          | 34          | 44           |  |
| Current smoking (%)             | 12                   | 8           | 8            | 10           | 9            | 8                     | 9           | 7            | 13          | 9           | 7                        | 13          | 9           | 7            |  |
| Alcohol consumption (g/day)     | 3.9 (7.1)            | 3.0 (4.9)   | 2.2 (3.8)    | 3.6 (6.1)    | 2.4 (4.2)    | 2.9 (4.5)             | 3.2 (6.6)   | 2.8 (4.3)    | 3.2 (6.6)   | 3.0 (4.8)   | 2.8 (4.3)                | 3.2 (6.6)   | 3.0 (4.8)   | 2.8 (4.3)    |  |
| BMI (kg/m <sup>2</sup> )        | 22.7 (4.0)           | 23.3 (4.1)  | 24.2 (4.6)   | 22.6 (3.9)   | 24.3 (4.7)   | 23.3 (4.1)            | 24.0 (4.8)  | 22.7 (3.7)   | 24.0 (4.8)  | 23.4 (4.2)  | 22.7 (3.7)               | 24.0 (4.8)  | 23.4 (4.2)  | 22.7 (3.7)   |  |
| Physical activity (h/week)      | 23.7 (30.7)          | 23.1 (29.2) | 24.3 (29.7)  | 25.7 (32.8)  | 23.3 (28.5)  | 21.9 (27.9)           | 19.1 (25.2) | 30.1 (35.8)  | 19.1 (25.2) | 22.6 (27.5) | 30.1 (35.8)              | 19.1 (25.2) | 22.6 (27.5) | 30.1 (35.8)  |  |
| Dietary factors (per day)       |                      |             |              |              |              |                       |             |              |             |             |                          |             |             |              |  |
| Total calories (kcal)           | 1,928 (601)          | 1,860 (534) | 1,658 (492)  | 1,899 (599)  | 1,673 (506)  | 1,878 (532)           | 1,864 (570) | 1,760 (544)  | 1,864 (570) | 1,844 (535) | 1,760 (544)              | 1,864 (570) | 1,844 (535) | 1,760 (544)  |  |
| Carbohydrate (%E)               | 56.3 (7.5)           | 50.2 (5.8)  | 45.5 (6.2)   | 56.9 (7.2)   | 44.7 (6.0)   | 50.5 (5.5)            | 48.1 (8.5)  | 55.0 (6.7)   | 48.1 (8.5)  | 50.0 (5.9)  | 55.0 (6.7)               | 48.1 (8.5)  | 50.0 (5.9)  | 55.0 (6.7)   |  |
| Total fat (%E)                  | 29.9 (6.1)           | 31.4 (5.2)  | 30.9 (5.3)   | 29.3 (6.1)   | 31.7 (5.3)   | 31.3 (5.1)            | 32.8 (5.8)  | 27.8 (5.3)   | 32.8 (5.8)  | 31.3 (4.8)  | 27.8 (5.3)               | 32.8 (5.8)  | 31.3 (4.8)  | 27.8 (5.3)   |  |
| Saturated fat (%E)              | 10.7 (2.7)           | 11.4 (2.3)  | 11.2 (2.3)   | 10.3 (2.6)   | 11.7 (2.3)   | 11.3 (2.2)            | 12.4 (2.5)  | 9.4 (2.1)    | 12.4 (2.5)  | 11.3 (2.0)  | 9.4 (2.1)                | 12.4 (2.5)  | 11.3 (2.0)  | 9.4 (2.1)    |  |
| Monounsaturated fat (%E)        | 11.4 (2.6)           | 11.9 (2.2)  | 11.4 (2.4)   | 11.1 (2.6)   | 11.7 (2.4)   | 11.8 (2.2)            | 12.4 (2.5)  | 10.4 (2.3)   | 12.4 (2.5)  | 11.8 (2.1)  | 10.4 (2.3)               | 12.4 (2.5)  | 11.8 (2.1)  | 10.4 (2.3)   |  |
| Polyunsaturated fat (%E)        | 5.4 (1.6)            | 5.5 (1.2)   | 5.4 (1.2)    | 5.5 (1.6)    | 5.4 (1.2)    | 5.4 (1.2)             | 5.2 (1.4)   | 5.6 (1.4)    | 5.2 (1.4)   | 5.5 (1.2)   | 5.6 (1.4)                | 5.2 (1.4)   | 5.5 (1.2)   | 5.6 (1.4)    |  |
| Trans fat (%E)                  | 1.7 (0.7)            | 1.6 (0.6)   | 1.4 (0.5)    | 1.6 (0.7)    | 1.5 (0.5)    | 1.6 (0.6)             | 1.7 (0.6)   | 1.3 (0.5)    | 1.7 (0.6)   | 1.6 (0.6)   | 1.3 (0.5)                | 1.7 (0.6)   | 1.6 (0.6)   | 1.3 (0.5)    |  |
| Cholesterol (mg)*               | 186 (54)             | 240 (51)    | 291 (62)     | 178 (50)     | 296 (61)     | 238 (47)              | 262 (68)    | 199 (63)     | 262 (68)    | 241 (56)    | 199 (63)                 | 262 (68)    | 241 (56)    | 199 (63)     |  |
| Glycemic index*                 | 55.4 (3.2)           | 53.9 (2.9)  | 52.5 (3.3)   | 55.2 (3.1)   | 52.4 (3.4)   | 54.1 (3.0)            | 53.8 (3.9)  | 54.2 (3.1)   | 53.8 (3.9)  | 54.0 (3.0)  | 54.2 (3.1)               | 53.8 (3.9)  | 54.0 (3.0)  | 54.2 (3.1)   |  |
| Glycemic load*                  | 1.4 (0.2)            | 1.2 (0.2)   | 1.1 (0.2)    | 1.4 (0.2)    | 1.1 (0.2)    | 1.2 (0.2)             | 1.2 (0.3)   | 1.3 (0.2)    | 1.2 (0.3)   | 1.2 (0.2)   | 1.3 (0.2)                | 1.2 (0.3)   | 1.2 (0.2)   | 1.3 (0.2)    |  |
| Total fiber (g)*                | 17.6 (6.2)           | 18.1 (4.9)  | 18.4 (5.5)   | 19.6 (7.1)   | 17.0 (5.1)   | 17.8 (4.7)            | 13.2 (3.0)  | 24.0 (6.3)   | 13.2 (3.0)  | 18.0 (3.4)  | 24.0 (6.3)               | 13.2 (3.0)  | 18.0 (3.4)  | 24.0 (6.3)   |  |
| Magnesium (mg)*                 | 289 (75)             | 320 (67)    | 346 (74)     | 308 (84)     | 335 (72)     | 315 (68)              | 280 (66)    | 369 (77)     | 280 (66)    | 316 (63)    | 369 (77)                 | 280 (66)    | 316 (63)    | 369 (77)     |  |
| Heme iron (mg)*                 | 0.7 (0.3)            | 1.1 (0.3)   | 1.5 (0.4)    | 0.7 (0.3)    | 1.5 (0.4)    | 1.1 (0.3)             | 1.2 (0.4)   | 0.9 (0.4)    | 1.2 (0.4)   | 1.1 (0.3)   | 0.9 (0.4)                | 1.2 (0.4)   | 1.1 (0.3)   | 0.9 (0.4)    |  |
| Potassium (mg)*                 | 2,627 (537)          | 2,903 (457) | 3,124 (482)  | 2,728 (581)  | 3,067 (480)  | 2,877 (469)           | 2,672 (489) | 3,110 (558)  | 2,672 (489) | 2,888 (449) | 3,110 (558)              | 2,672 (489) | 2,888 (449) | 3,110 (558)  |  |
| Calcium (mg)*                   | 890 (357)            | 1,090 (392) | 1,199 (473)  | 907 (367)    | 1,214 (484)  | 1,078 (390)           | 1,110 (482) | 1,042 (399)  | 1,110 (482) | 1,065 (400) | 1,042 (399)              | 1,110 (482) | 1,065 (400) | 1,042 (399)  |  |
| Vitamin C (mg)*                 | 263 (296)            | 239 (253)   | 252 (291)    | 281 (317)    | 243 (286)    | 229 (230)             | 213 (238)   | 304 (334)    | 213 (238)   | 237 (243)   | 304 (334)                | 213 (238)   | 237 (243)   | 304 (334)    |  |
| Vitamin E (mg)*                 | 37.0 (110.1)         | 32.4 (93.4) | 34.9 (107.9) | 39.4 (114.7) | 33.7 (104.8) | 29.9 (83.9)           | 27.2 (72.4) | 45.6 (127.4) | 27.2 (72.4) | 33.1 (91.5) | 45.6 (127.4)             | 27.2 (72.4) | 33.1 (91.5) | 45.6 (127.4) |  |
| Fruits (servings)               | 1.2 (1.1)            | 1.2 (0.9)   | 1.1 (0.8)    | 1.3 (1.2)    | 1.1 (0.8)    | 1.2 (0.9)             | 0.9 (0.8)   | 1.5 (1.1)    | 0.9 (0.8)   | 1.3 (0.9)   | 1.5 (1.1)                | 0.9 (0.8)   | 1.3 (0.9)   | 1.5 (1.1)    |  |
| Vegetables (servings)           | 2.9 (2.0)            | 3.2 (1.9)   | 3.5 (2.2)    | 3.3 (2.3)    | 3.2 (1.9)    | 3.2 (1.9)             | 2.3 (1.3)   | 4.3 (2.7)    | 2.3 (1.3)   | 3.1 (1.6)   | 4.3 (2.7)                | 2.3 (1.3)   | 3.1 (1.6)   | 4.3 (2.7)    |  |
| Unprocessed red meat (servings) | 0.4 (0.3)            | 0.6 (0.4)   | 0.6 (0.5)    | 0.4 (0.3)    | 0.6 (0.5)    | 0.6 (0.4)             | 0.7 (0.5)   | 0.3 (0.3)    | 0.7 (0.5)   | 0.5 (0.3)   | 0.3 (0.3)                | 0.7 (0.5)   | 0.5 (0.3)   | 0.3 (0.3)    |  |
| Processed red meat (servings)   | 1.2 (1.2)            | 1.2 (1.2)   | 0.9 (1.1)    | 1.1 (1.2)    | 1.0 (1.1)    | 1.2 (1.2)             | 1.4 (1.3)   | 0.7 (1.0)    | 1.4 (1.3)   | 1.2 (1.1)   | 0.7 (1.0)                | 1.4 (1.3)   | 1.2 (1.1)   | 0.7 (1.0)    |  |
| Poultry (servings)              | 0.3 (0.2)            | 0.4 (0.2)   | 0.7 (0.4)    | 0.3 (0.2)    | 0.7 (0.4)    | 0.5 (0.2)             | 0.5 (0.3)   | 0.4 (0.3)    | 0.5 (0.3)   | 0.5 (0.3)   | 0.4 (0.3)                | 0.5 (0.3)   | 0.5 (0.3)   | 0.4 (0.3)    |  |
| Fish (servings)                 | 0.1 (0.1)            | 0.2 (0.2)   | 0.3 (0.3)    | 0.2 (0.2)    | 0.3 (0.3)    | 0.2 (0.2)             | 0.2 (0.2)   | 0.3 (0.2)    | 0.2 (0.2)   | 0.2 (0.2)   | 0.3 (0.2)                | 0.2 (0.2)   | 0.2 (0.2)   | 0.3 (0.2)    |  |
| Dairy products (servings)       | 2.2 (1.5)            | 2.7 (1.5)   | 2.6 (1.6)    | 2.1 (1.4)    | 2.8 (1.7)    | 2.7 (1.5)             | 3.0 (1.8)   | 2.0 (1.3)    | 3.0 (1.8)   | 2.6 (1.4)   | 2.0 (1.3)                | 3.0 (1.8)   | 2.6 (1.4)   | 2.0 (1.3)    |  |
| Eggs (servings)                 | 0.2 (0.2)            | 0.2 (0.2)   | 0.2 (0.2)    | 0.2 (0.2)    | 0.2 (0.2)    | 0.2 (0.2)             | 0.2 (0.2)   | 0.1 (0.2)    | 0.2 (0.2)   | 0.2 (0.2)   | 0.1 (0.2)                | 0.2 (0.2)   | 0.2 (0.2)   | 0.1 (0.2)    |  |
| Nuts (servings)                 | 0.3 (0.4)            | 0.3 (0.3)   | 0.2 (0.2)    | 0.3 (0.5)    | 0.2 (0.2)    | 0.3 (0.3)             | 0.1 (0.2)   | 0.4 (0.5)    | 0.1 (0.2)   | 0.2 (0.3)   | 0.4 (0.5)                | 0.1 (0.2)   | 0.2 (0.3)   | 0.4 (0.5)    |  |
| Legumes (servings)              | 0.3 (0.3)            | 0.4 (0.3)   | 0.4 (0.4)    | 0.4 (0.4)    | 0.4 (0.4)    | 0.4 (0.3)             | 0.2 (0.2)   | 0.5 (0.5)    | 0.2 (0.2)   | 0.3 (0.3)   | 0.5 (0.5)                | 0.2 (0.2)   | 0.3 (0.3)   | 0.5 (0.5)    |  |
| SSBs (servings)                 | 1.2 (1.4)            | 0.4 (0.6)   | 0.2 (0.3)    | 0.9 (1.3)    | 0.2 (0.4)    | 0.5 (0.7)             | 1.0 (1.3)   | 0.2 (0.4)    | 1.0 (1.3)   | 0.4 (0.6)   | 0.2 (0.4)                | 1.0 (1.3)   | 0.4 (0.6)   | 0.2 (0.4)    |  |
| Whole grains (servings)         | 1.1 (1.1)            | 1.1 (1.0)   | 1.0 (0.9)    | 1.3 (1.2)    | 1.1 (0.9)    | 1.1 (1.0)             | 0.6 (0.6)   | 1.8 (1.3)    | 0.6 (0.6)   | 1.1 (0.9)   | 1.8 (1.3)                | 0.6 (0.6)   | 1.1 (0.9)   | 1.8 (1.3)    |  |

Values are means (SD) unless otherwise specified. All comparisons across quintiles of dietary protein intake are significant except the following: total protein, physical activity, and vitamin E intake; animal protein, age, and vegetable intake; and vegetable protein, family history of diabetes, and alcohol consumption. %E, % of energy; SSB, sugar-sweetened beverage. \*Value is energy adjusted.

**Table 2—RRs (95% CIs) for GDM according to quintiles of prepregnancy dietary protein intake**

|                                             | Q1    | Q2               | Q3               | Q4               | Q5               | P      |
|---------------------------------------------|-------|------------------|------------------|------------------|------------------|--------|
| <b>Total protein</b>                        |       |                  |                  |                  |                  |        |
| Median protein intake<br>(% energy per day) | 15.23 | 17.53            | 19.14            | 20.78            | 23.30            | —      |
| Model 1                                     | 1.00  | 1.03 (0.83–1.29) | 1.02 (0.82–1.28) | 1.31 (1.06–1.62) | 1.22 (0.98–1.53) | 0.011  |
| Model 2                                     | 1.00  | 1.10 (0.88–1.37) | 1.07 (0.85–1.34) | 1.38 (1.11–1.71) | 1.26 (1.01–1.58) | 0.007  |
| Model 3                                     | 1.00  | 1.17 (0.92–1.48) | 1.19 (0.91–1.55) | 1.58 (1.19–2.10) | 1.46 (1.03–2.07) | 0.012  |
| Model 4                                     | 1.00  | 1.13 (0.89–1.44) | 1.13 (0.86–1.48) | 1.43 (1.08–1.91) | 1.28 (0.90–1.83) | 0.086  |
| <b>Animal protein</b>                       |       |                  |                  |                  |                  |        |
| Median intake<br>(% energy per day)         | 10.00 | 12.41            | 14.10            | 15.86            | 18.58            | —      |
| Model 1                                     | 1.00  | 1.02 (0.81–1.28) | 1.01 (0.80–1.27) | 1.37 (1.10–1.69) | 1.45 (1.17–1.81) | <0.001 |
| Model 2                                     | 1.00  | 1.04 (0.83–1.30) | 1.00 (0.79–1.26) | 1.38 (1.11–1.72) | 1.44 (1.15–1.80) | <0.001 |
| Model 3                                     | 1.00  | 1.07 (0.84–1.37) | 1.09 (0.83–1.45) | 1.57 (1.16–2.13) | 1.65 (1.14–2.38) | 0.002  |
| Model 4                                     | 1.00  | 1.05 (0.82–1.34) | 1.06 (0.80–1.40) | 1.46 (1.08–1.99) | 1.49 (1.03–2.17) | 0.013  |
| <b>Vegetable protein</b>                    |       |                  |                  |                  |                  |        |
| Median intake<br>(% energy per day)         | 3.78  | 4.46             | 4.96             | 5.47             | 6.36             | —      |
| Model 1                                     | 1.00  | 0.89 (0.73–1.08) | 0.76 (0.62–0.94) | 0.71 (0.58–0.88) | 0.53 (0.42–0.67) | <0.001 |
| Model 2                                     | 1.00  | 0.94 (0.77–1.15) | 0.82 (0.67–1.01) | 0.79 (0.63–0.97) | 0.59 (0.47–0.75) | <0.001 |
| Model 3                                     | 1.00  | 0.93 (0.75–1.16) | 0.83 (0.65–1.06) | 0.82 (0.63–1.09) | 0.70 (0.50–0.98) | 0.038  |
| Model 4                                     | 1.00  | 0.92 (0.74–1.15) | 0.84 (0.65–1.08) | 0.83 (0.62–1.09) | 0.69 (0.50–0.97) | 0.034  |

Model 1: age (5-year category) and parity (0, 1, 2, and ≥3). Model 2: model 1 adjustments plus race/ethnicity (Caucasian, African American, Hispanic, Asian, and others), family history of diabetes (yes and no), cigarette smoking (never, past, and current), alcohol intake (0, 0.1–5.0, 5.1–10.0, or >10 g/day), physical activity (quintiles), and total energy intake (quintiles). Model 3: model 2 adjustments plus saturated fat (quintiles), monounsaturated fat (quintiles), polyunsaturated fat (quintiles), *trans* fat (quintiles), dietary cholesterol (quintiles), glycemic load (quintiles), dietary fiber (quintiles), and mutual adjustment for animal protein and vegetable protein. Model 4: model 3 adjustments plus BMI (<21, 21–22.9, 23.0–24.9, 25.0–26.9, 27.0–28.9, 29.0–30.9, 31.0–32.9, 33.0–34.9, and ≥35.0 kg/m<sup>2</sup>). Q, quintile.

follow-up (12). Although no significant association was observed for other animal foods, the substitution of fish and poultry for red meat was associated with a lower risk of GDM. By contrast, a significant and inverse association was found between nut consumption and risk of GDM. An inverse association between nut consumption and risk of T2DM was

previously observed in the NHS participants (13). Nuts have a healthful nutritional profile; in addition to being a good source of vegetable protein, nuts are rich in monounsaturated fatty acids, polyunsaturated fatty acids, fiber, and magnesium and have a relatively low glycemic index (13,33). These factors, either individually or in combination, have been

associated with improved insulin sensitivity and lower diabetes risk (33).

The distinct effects of animal protein and vegetable protein on the incidence of GDM could be attributable to other nutrients coexistent in foods rich in protein, e.g., the co-occurrence of cholesterol and saturated fat in foods rich in animal protein. However, in the current study, the association of animal protein and GDM risk remained significant even after the adjustment of dietary cholesterol and saturated fat intakes. The distinct effects could be also due to variations of amino acid composition in these foods. Several *in vitro* and *in vivo* studies support an important role of amino acids in glucose homeostasis through regulation of glucose uptake and glycogen synthesis in skeletal muscle, hepatic glucose production, and insulin secretion (8). It has long been recognized that the plasma concentrations of BCAAs are dramatically raised to ~200% of fasting values after the ingestion of an animal protein-rich meal (34). A recent study showed that dietary proteins isolated from beef and pork meat resulted in significantly higher plasma concentrations of BCAAs than soy protein

**Table 3—Multivariate RRs (95% CIs) of GDM associated with increases in 5% of energy from types of protein**

|                                               | RRs (95% CIs)<br>in the multivariate<br>model |       | RRs (95% CIs)<br>in the multivariate<br>model plus BMI |       |
|-----------------------------------------------|-----------------------------------------------|-------|--------------------------------------------------------|-------|
|                                               |                                               | P     |                                                        | P     |
| <b>Substitution for carbohydrate intake</b>   |                                               |       |                                                        |       |
| Total protein                                 | 1.35 (1.14–1.61)                              | 0.001 | 1.28 (1.07–1.53)                                       | 0.007 |
| Animal protein                                | 1.36 (1.14–1.62)                              | 0.001 | 1.29 (1.08–1.54)                                       | 0.006 |
| Vegetable protein                             | 0.61 (0.35–1.08)                              | 0.089 | 0.58 (0.33–1.03)                                       | 0.064 |
| <b>Substitution for animal protein intake</b> |                                               |       |                                                        |       |
| Vegetable protein                             | 0.49 (0.29–0.83)                              | 0.008 | 0.49 (0.29–0.84)                                       | 0.009 |

Covariates adjusted in the multivariate model were age (5-year category), parity (0, 1, 2, and ≥3), race/ethnicity (Caucasian, African American, Hispanic, Asian, and others), family history of diabetes (yes and no), cigarette smoking (never, past, and current), alcohol intake (0, 0.1–5.0, 5.1–10.0, or >10 g/day), physical activity (quintiles), total energy intake (quintiles), dietary cholesterol (quintiles), glycemic load (quintiles), and dietary fiber (quintiles). BMI was categorized as <21, 21–22.9, 23.0–24.9, 25.0–26.9, 27.0–28.9, 29.0–30.9, 31.0–32.9, 33.0–34.9, and ≥35.0 kg/m<sup>2</sup>.

Table 4—RRs (95% CIs) for GDM according to quintiles of prepregnancy intake (servings per day) of major sources of dietary protein

|                             | Q1   | Q2               | Q3               | Q4               | Q5               | P      | RR for 1 serving/day |
|-----------------------------|------|------------------|------------------|------------------|------------------|--------|----------------------|
| <b>Total red meat</b>       |      |                  |                  |                  |                  |        |                      |
| Median intake               | 0.20 | 0.48             | 0.70             | 0.99             | 1.50             |        |                      |
| Model 1                     | 1.00 | 1.43 (1.14–1.81) | 1.69 (1.34–2.14) | 2.02 (1.60–2.56) | 2.72 (2.16–3.43) | <0.001 | 2.05 (1.76–2.39)     |
| Model 2                     | 1.00 | 1.37 (1.08–1.75) | 1.61 (1.25–2.08) | 1.90 (1.45–2.47) | 2.46 (1.86–3.25) | <0.001 | 1.88 (1.55–2.27)     |
| Model 3                     | 1.00 | 1.27 (0.99–1.62) | 1.43 (1.10–1.85) | 1.63 (1.24–2.12) | 2.05 (1.55–2.73) | <0.001 | 1.66 (1.36–2.02)     |
| <b>Unprocessed red meat</b> |      |                  |                  |                  |                  |        |                      |
| Median intake               | 0.13 | 0.31             | 0.44             | 0.70             | 1.07             |        |                      |
| Model 1                     | 1.00 | 1.39 (1.10–1.75) | 1.52 (1.20–1.92) | 1.97 (1.57–2.46) | 2.48 (1.97–3.12) | <0.001 | 2.50 (2.03–3.08)     |
| Model 2                     | 1.00 | 1.24 (0.97–1.58) | 1.33 (1.02–1.71) | 1.61 (1.25–2.07) | 1.89 (1.43–2.48) | <0.001 | 1.95 (1.50–2.52)     |
| Model 3                     | 1.00 | 1.17 (0.91–1.49) | 1.23 (0.95–1.59) | 1.44 (1.12–1.87) | 1.60 (1.21–2.12) | <0.001 | 1.65 (1.26–2.14)     |
| <b>Processed red meat</b>   |      |                  |                  |                  |                  |        |                      |
| Median intake               | 0.00 | 0.07             | 0.14             | 0.28             | 0.56             |        |                      |
| Model 1                     | 1.00 | 1.28 (1.00–1.63) | 1.61 (1.29–2.02) | 1.72 (1.36–2.17) | 2.04 (1.61–2.58) | <0.001 | 2.85 (2.04–3.98)     |
| Model 2                     | 1.00 | 1.16 (0.90–1.49) | 1.36 (1.07–1.74) | 1.38 (1.06–1.79) | 1.48 (1.13–1.95) | 0.012  | 1.66 (1.12–2.47)     |
| Model 3                     | 1.00 | 1.13 (0.88–1.46) | 1.28 (1.01–1.64) | 1.29 (0.99–1.68) | 1.36 (1.03–1.80) | 0.062  | 1.47 (0.98–2.20)     |
| <b>Poultry</b>              |      |                  |                  |                  |                  |        |                      |
| Median intake               | 0.14 | 0.28             | 0.43             | 0.57             | 0.86             |        |                      |
| Model 1                     | 1.00 | 1.12 (0.89–1.39) | 1.12 (0.90–1.39) | 1.04 (0.82–1.31) | 1.15 (0.92–1.45) | 0.422  | 1.12 (0.85–1.49)     |
| Model 2                     | 1.00 | 1.12 (0.89–1.41) | 1.11 (0.88–1.39) | 1.04 (0.81–1.33) | 1.18 (0.92–1.51) | 0.363  | 1.16 (0.85–1.58)     |
| Model 3                     | 1.00 | 1.10 (0.88–1.39) | 1.08 (0.86–1.36) | 0.98 (0.76–1.26) | 1.04 (0.81–1.34) | 0.874  | 0.97 (0.71–1.33)     |
| <b>Fish</b>                 |      |                  |                  |                  |                  |        |                      |
| Median intake               | 0.07 | 0.13             | 0.17             | 0.24             | 0.50             |        |                      |
| Model 1                     | 1.00 | 0.92 (0.75–1.14) | 0.80 (0.63–1.00) | 0.96 (0.79–1.16) | 0.84 (0.68–1.03) | 0.177  | 0.73 (0.46–1.15)     |
| Model 2                     | 1.00 | 0.96 (0.77–1.19) | 0.83 (0.66–1.05) | 1.05 (0.86–1.29) | 0.96 (0.77–1.20) | 0.993  | 1.00 (0.62–1.63)     |
| Model 3                     | 1.00 | 0.95 (0.76–1.18) | 0.84 (0.66–1.06) | 1.07 (0.88–1.32) | 0.95 (0.76–1.18) | 0.898  | 0.97 (0.60–1.57)     |
| <b>Eggs</b>                 |      |                  |                  |                  |                  |        |                      |
| Median intake               | 0.00 | 0.07             | 0.10             | 0.14             | 0.43             |        |                      |
| Model 1                     | 1.00 | 0.96 (0.78–1.18) | 0.94 (0.66–1.32) | 1.00 (0.80–1.23) | 1.18 (0.95–1.48) | 0.031  | 1.66 (1.05–2.61)     |
| Model 2                     | 1.00 | 0.88 (0.71–1.10) | 0.86 (0.60–1.23) | 0.84 (0.67–1.05) | 0.95 (0.75–1.21) | 0.587  | 1.15 (0.69–1.90)     |
| Model 3                     | 1.00 | 0.88 (0.71–1.10) | 0.79 (0.55–1.13) | 0.83 (0.66–1.05) | 0.93 (0.73–1.19) | 0.748  | 1.09 (0.65–1.81)     |
| <b>Dairy products</b>       |      |                  |                  |                  |                  |        |                      |
| Median intake               | 0.76 | 1.36             | 1.97             | 2.91             | 4.20             |        |                      |
| Model 1                     | 1.00 | 0.96 (0.75–1.21) | 0.97 (0.77–1.21) | 1.05 (0.84–1.32) | 0.82 (0.66–1.03) | 0.123  | 0.96 (0.91–1.01)     |
| Model 2                     | 1.00 | 1.01 (0.79–1.29) | 1.05 (0.82–1.35) | 1.11 (0.86–1.43) | 0.88 (0.67–1.15) | 0.297  | 0.96 (0.90–1.03)     |
| Model 3                     | 1.00 | 0.97 (0.76–1.25) | 1.04 (0.81–1.34) | 1.07 (0.83–1.39) | 0.83 (0.63–1.09) | 0.144  | 0.95 (0.89–1.02)     |
| <b>Nuts</b>                 |      |                  |                  |                  |                  |        |                      |
| Median intake               | 0.00 | 0.07             | 0.14             | 0.28             | 0.60             |        |                      |
| Model 1                     | 1.00 | 0.86 (0.70–1.07) | 0.94 (0.76–1.16) | 0.88 (0.72–1.08) | 0.69 (0.55–0.87) | 0.004  | 0.59 (0.42–0.84)     |
| Model 2                     | 1.00 | 0.90 (0.72–1.11) | 0.95 (0.77–1.19) | 0.92 (0.74–1.14) | 0.72 (0.55–0.93) | 0.015  | 0.62 (0.42–0.91)     |
| Model 3                     | 1.00 | 0.88 (0.71–1.10) | 0.95 (0.76–1.19) | 0.93 (0.75–1.17) | 0.73 (0.56–0.95) | 0.028  | 0.64 (0.44–0.95)     |
| <b>Legumes</b>              |      |                  |                  |                  |                  |        |                      |
| Median intake               | 0.07 | 0.20             | 0.29             | 0.43             | 0.79             |        |                      |
| Model 1                     | 1.00 | 1.02 (0.84–1.24) | 0.98 (0.79–1.22) | 0.94 (0.77–1.16) | 1.07 (0.87–1.33) | 0.648  | 1.07 (0.80–1.43)     |
| Model 2                     | 1.00 | 1.03 (0.84–1.26) | 0.97 (0.77–1.22) | 0.91 (0.74–1.13) | 1.02 (0.81–1.29) | 0.909  | 0.98 (0.72–1.34)     |
| Model 3                     | 1.00 | 1.04 (0.84–1.27) | 0.98 (0.78–1.22) | 0.93 (0.75–1.16) | 1.06 (0.84–1.33) | 0.854  | 1.03 (0.75–1.41)     |

Model 1: age (5-year category) and parity (0, 1, 2, and  $\geq 3$ ). Model 2: model 1 adjustments plus race/ethnicity (Caucasian, African American, Hispanic, Asian, and others), family history of diabetes (yes and no), cigarette smoking (never, past, and current), alcohol intake (0, 0.1–5.0, 5.1–10.0, and  $>10$  g/day), physical activity (quintiles), and total energy intake (quintiles), fruits intake (quintiles), sugar-sweetened beverage intake (quintiles), whole grain intake (quintiles), and mutual adjustment for other major dietary protein sources. Model 3: model 2 adjustments plus BMI ( $<21$ , 21–22.9, 23.0–24.9, 25.0–26.9, 27.0–28.9, 29.0–30.9, 31.0–32.9, 33.0–34.9, and  $\geq 35.0$  kg/m<sup>2</sup>).

(35). Although the BCAAs constitute only around 20% of the total amino acid content in red meat, they represent the majority of the amino acids entering the systemic circulation after a red meat meal (34). Recently, a BCAAs-related

metabolic signature has been implicated in the development of insulin resistance among both obese (36) and nonobese (37) individuals, and elevated plasma levels of BCAAs, tyrosine, and phenylalanine have been linked to incident diabetes in a

metabolomics study (10). The associations of BCAAs and other amino acid intakes with GDM risk need to be elucidated in future studies.

Strengths of this study include the large sample size, the high response rates

of long-term follow-up, and the detailed prospective dietary assessments with FFQs that have been extensively validated against multiple weeks of food records in previous studies (19–21). We acknowledge that there are several limitations. First, misclassification of dietary protein intake is possible. However, the random within-person error would be nondifferential, given that the prepregnancy dietary information was captured prospectively; therefore, our observed associations may underestimate the true RRs. Furthermore, the use of cumulative averages of dietary intakes for participants with more than one prepregnancy FFQ reduces random error. Second, the NHS II cohort did not assess diet during pregnancy. Therefore, we are unable to assess the association of prepregnancy protein intake with GDM risk, independent of diet during pregnancy. However, evidence suggests that the overall dietary patterns and dietary intakes of major protein sources change little from prepregnancy to during pregnancy (38,39). In addition, although GDM is a pregnancy complication (usually diagnosed in 24–28 weeks of gestation), increasing evidence suggests that most women with GDM seem to have a chronic  $\beta$ -cell defect before pregnancy (40). Women who develop GDM are thought to have a compromised capacity to adapt to the metabolic challenges of pregnancy, which serves to unmask a predisposition to glucose metabolic disorders in these women (40,41). Therefore, prepregnancy dietary factors implicated in glucose homeostasis are also physiologically relevant to the development of GDM. Third, our study population consisted mostly of Caucasian American women; thus, the generalization of our findings to other races and ethnic groups may be limited. However, the relative homogeneity of our study population reduces potential confounding. Fourth, plasma amino acid data were not available thus far in this population. The inclusion of plasma amino acids data may help better understand the underlying mechanisms for the divergent effects of animal and vegetable protein intakes on GDM risk. Finally, although major potential confounders have been adjusted in the current study, we cannot completely rule out the possibility of residual confounding from unmeasured factors. In addition, because of the high correlations among nutrients coexisting with protein in common food sources, we could not exclude the possibility of

overadjustment, which may lead to an underestimate of the real associations of animal and vegetable protein intake with GDM risk.

In summary, our findings indicate that prepregnancy intake of animal protein, in particular red meat, is significantly and positively associated with GDM risk, whereas consumption of vegetable protein, specifically nuts, is inversely associated with the risk. Moreover, our findings suggest that among women of reproductive age, substitution of vegetable protein for animal protein, as well as substitution of some healthy protein sources (e.g., nuts, legumes, poultry, and fish) for red meat may potentially lower GDM risk. Along with our previous findings on associations of GDM risk with carbohydrates (6) and fats (7), the joint effects of different amounts and types of these macronutrients on the risk of GDM warrant further investigation in future studies.

**Acknowledgments**—This study was funded by the Intramural Research Program of the Eunice Kennedy Shriver National Institute of Child Health and Human Development, National Institutes of Health (contract no. HHSN275201000020C). The Nurses' Health Study II was funded by research grants DK58845, CA50385, and P30 DK46200 from the National Institutes of Health.

No potential conflicts of interest relevant to this article were reported.

W.B. contributed to the design and analysis of the study and wrote the manuscript. K.B. contributed to the data analysis, and reviewed and edited the manuscript. D.K.T. conducted the technique review and reviewed and edited the manuscript. F.B.H. interpreted the results and reviewed and edited the manuscript. C.Z. contributed to the design and analysis of the study, and reviewed and edited the manuscript. W.B. and C.Z. are the guarantors of this work and, as such, had full access to all the data in the study and take responsibility for the integrity of the data and the accuracy of the data analysis.

Parts of this study were presented in abstract form at the 45th Society for Epidemiologic Research Annual Meeting, Minneapolis, Minnesota, 27–30 June 2012.

**References**

1. Reece EA, Leguizamón G, Wiznitzer A. Gestational diabetes: the need for a common ground. *Lancet* 2009;373:1789–1797
2. American Diabetes Association. Gestational diabetes mellitus. *Diabetes Care* 2004;27(Suppl 1):S88–S90
3. Metzger BE, Lowe LP, Dyer AR, et al.; HAPO Study Cooperative Research Group.

- Hyperglycemia and adverse pregnancy outcomes. *N Engl J Med* 2008;358:1991–2002
4. Bellamy L, Casas JP, Hingorani AD, Williams D. Type 2 diabetes mellitus after gestational diabetes: a systematic review and meta-analysis. *Lancet* 2009;373:1773–1779
5. Zhang C, Ning Y. Effect of dietary and lifestyle factors on the risk of gestational diabetes: review of epidemiologic evidence. *Am J Clin Nutr* 2011;94(Suppl.):1975S–1979S
6. Zhang C, Liu S, Solomon CG, Hu FB. Dietary fiber intake, dietary glycemic load, and the risk for gestational diabetes mellitus. *Diabetes Care* 2006;29:2223–2230
7. Bowers K, Tobias DK, Yeung E, Hu FB, Zhang C. A prospective study of prepregnancy dietary fat intake and risk of gestational diabetes. *Am J Clin Nutr* 2012;95:446–453
8. Tremblay F, Lavigne C, Jacques H, Marette A. Role of dietary proteins and amino acids in the pathogenesis of insulin resistance. *Annu Rev Nutr* 2007;27:293–310
9. Sluijs I, Beulens JW, van der A DL, Spijkerman AM, Grobbee DE, van der Schouw YT. Dietary intake of total, animal, and vegetable protein and risk of type 2 diabetes in the European Prospective Investigation into Cancer and Nutrition (EPIC)-NL study. *Diabetes Care* 2010;33:43–48
10. Wang TJ, Larson MG, Vasan RS, et al. Metabolite profiles and the risk of developing diabetes. *Nat Med* 2011;17:448–453
11. Pan A, Sun Q, Bernstein AM, et al. Red meat consumption and risk of type 2 diabetes: 3 cohorts of US adults and an updated meta-analysis. *Am J Clin Nutr* 2011;94:1088–1096
12. Zhang C, Schulze MB, Solomon CG, Hu FB. A prospective study of dietary patterns, meat intake and the risk of gestational diabetes mellitus. *Diabetologia* 2006;49:2604–2613
13. Jiang R, Manson JE, Stampfer MJ, Liu S, Willett WC, Hu FB. Nut and peanut butter consumption and risk of type 2 diabetes in women. *JAMA* 2002;288:2554–2560
14. Villegas R, Gao YT, Yang G, et al. Legume and soy food intake and the incidence of type 2 diabetes in the Shanghai Women's Health Study. *Am J Clin Nutr* 2008;87:162–167
15. Solomon CG, Willett WC, Carey VJ, et al. A prospective study of pregravid determinants of gestational diabetes mellitus. *JAMA* 1997;278:1078–1083
16. Bernstein AM, Sun Q, Hu FB, Stampfer MJ, Manson JE, Willett WC. Major dietary protein sources and risk of coronary heart disease in women. *Circulation* 2010;122:876–883

17. Bernstein AM, Pan A, Rexrode KM, et al. Dietary protein sources and the risk of stroke in men and women. *Stroke* 2012; 43:637–644
18. Hu FB, Stampfer MJ, Manson JE, et al. Dietary protein and risk of ischemic heart disease in women. *Am J Clin Nutr* 1999; 70:221–227
19. Willett WC, Sampson L, Stampfer MJ, et al. Reproducibility and validity of a semiquantitative food frequency questionnaire. *Am J Epidemiol* 1985;122:51–65
20. Willett WC, Sampson L, Browne ML, et al. The use of a self-administered questionnaire to assess diet four years in the past. *Am J Epidemiol* 1988;127:188–199
21. Salvini S, Hunter DJ, Sampson L, et al. Food-based validation of a dietary questionnaire: the effects of week-to-week variation in food consumption. *Int J Epidemiol* 1989;18:858–867
22. Rimm EB, Stampfer MJ, Colditz GA, Chute CG, Litin LB, Willett WC. Validity of self-reported waist and hip circumferences in men and women. *Epidemiology* 1990;1:466–473
23. Wolf AM, Hunter DJ, Colditz GA, et al. Reproducibility and validity of a self-administered physical activity questionnaire. *Int J Epidemiol* 1994;23:991–999
24. Willett WC. *Nutritional Epidemiology*. 2nd ed. New York, Oxford University Press, 1998
25. Hu FB, Stampfer MJ, Rimm E, et al. Dietary fat and coronary heart disease: a comparison of approaches for adjusting for total energy intake and modeling repeated dietary measurements. *Am J Epidemiol* 1999;149:531–540
26. Hu FB, Stampfer MJ, Manson JE, et al. Dietary fat intake and the risk of coronary heart disease in women. *N Engl J Med* 1997;337:1491–1499
27. Pan A, Sun Q, Bernstein AM, et al. Red meat consumption and mortality: results from 2 prospective cohort studies. *Arch Intern Med* 2012;172:555–563
28. Lao TT, Ho LF, Chan BC, Leung WC. Maternal age and prevalence of gestational diabetes mellitus. *Diabetes Care* 2006;29: 948–949
29. Lin DY, Fleming TR, De Gruttola V. Estimating the proportion of treatment effect explained by a surrogate marker. *Stat Med* 1997;16:1515–1527
30. Linn T, Santosa B, Grönemeyer D, et al. Effect of long-term dietary protein intake on glucose metabolism in humans. *Diabetologia* 2000;43:1257–1265
31. Daniel CR, Cross AJ, Koebnick C, Sinha R. Trends in meat consumption in the USA. *Public Health Nutr* 2011;14:575–583
32. Mozaffarian D, Hao T, Rimm EB, Willett WC, Hu FB. Changes in diet and lifestyle and long-term weight gain in women and men. *N Engl J Med* 2011;364:2392–2404
33. Kendall CW, Josse AR, Esfahani A, Jenkins DJ. Nuts, metabolic syndrome and diabetes. *Br J Nutr* 2010;104:465–473
34. Adeva MM, Calviño J, Souto G, Donapetry C. Insulin resistance and the metabolism of branched-chain amino acids in humans. *Amino Acids* 2012;43:171–181
35. Brandsch C, Shukla A, Hirche F, Stangl GI, Eder K. Effect of proteins from beef, pork, and turkey meat on plasma and liver lipids of rats compared with casein and soy protein. *Nutrition* 2006;22:1162–1170
36. Newgard CB, An J, Bain JR, et al. A branched-chain amino acid-related metabolic signature that differentiates obese and lean humans and contributes to insulin resistance. *Cell Metab* 2009;9:311–326
37. Tai ES, Tan ML, Stevens RD, et al. Insulin resistance is associated with a metabolic profile of altered protein metabolism in Chinese and Asian-Indian men. *Diabetologia* 2010;53:757–767
38. Cucó G, Fernández-Ballart J, Sala J, et al. Dietary patterns and associated lifestyles in preconception, pregnancy and postpartum. *Eur J Clin Nutr* 2006;60:364–371
39. Crozier SR, Robinson SM, Godfrey KM, Cooper C, Inskip HM. Women's dietary patterns change little from before to during pregnancy. *J Nutr* 2009;139:1956–1963
40. Buchanan TA, Xiang AH, Page KA. Gestational diabetes mellitus: risks and management during and after pregnancy. *Nat Rev Endocrinol* 2012;8:639–649
41. Zhang C, Solomon CG, Manson JE, Hu FB. A prospective study of pregravid physical activity and sedentary behaviors in relation to the risk for gestational diabetes mellitus. *Arch Intern Med* 2006; 166:543–548
